# Supplementary material for: Uptake of human papillomavirus (HPV) vaccination in Hong Kong: Facilitators and barriers among adolescent girls and their parents
Source: PubMed Central journal article supplement (PMC5854366; doi:10.1371/journal.pone.0194159), 2018-03-15
Supplement: pone.0194159.s002.pdf [file pone.0194159.s002.pdf]

香港中文大學  
健康教育及促進健康中心和微生物學系  
預防子宮頸癌計劃

學童問卷調查

請細閱以下各題，並在合適的方格內填上「✓」。

1. 你的出生日期是：\_\_\_\_\_年 \_\_\_\_\_月 \_\_\_\_\_日

2. 你會否參與是次「預防子宮頸癌疫苗接種計劃」？

- 會 → 請答 **2A** 及 第 **3** 題
- 不會 → 請答 **2B** 及 第 **3** 題
- 本身已接種子宮頸癌預防疫苗 → 請跳到第 **4** 題

**2A.** 以下因素如何影響你參與是次  
「預防子宮頸癌疫苗接種計劃」？

|                | 絕對沒有<br>影響               | 沒有<br>影響                 | 有影響                      | 有很大<br>影響                |
|----------------|--------------------------|--------------------------|--------------------------|--------------------------|
| a. 是次計劃由校本統籌   | <input type="checkbox"/> | <input type="checkbox"/> | <input type="checkbox"/> | <input type="checkbox"/> |
| b. 是次計劃由大學推薦   | <input type="checkbox"/> | <input type="checkbox"/> | <input type="checkbox"/> | <input type="checkbox"/> |
| c. 疫苗能有效預防子宮頸癌 | <input type="checkbox"/> | <input type="checkbox"/> | <input type="checkbox"/> | <input type="checkbox"/> |
| d. 疫苗安全        | <input type="checkbox"/> | <input type="checkbox"/> | <input type="checkbox"/> | <input type="checkbox"/> |
| e. 免費接種疫苗      | <input type="checkbox"/> | <input type="checkbox"/> | <input type="checkbox"/> | <input type="checkbox"/> |
| f. 醫生建議        | <input type="checkbox"/> | <input type="checkbox"/> | <input type="checkbox"/> | <input type="checkbox"/> |
| g. 父母／家人／親戚建議  | <input type="checkbox"/> | <input type="checkbox"/> | <input type="checkbox"/> | <input type="checkbox"/> |
| h. 同學／朋友一起參與   | <input type="checkbox"/> | <input type="checkbox"/> | <input type="checkbox"/> | <input type="checkbox"/> |

**2B.** 以下因素如何影響你不參與是次  
「預防子宮頸癌疫苗接種計劃」？

|               | 絕對沒有<br>影響               | 沒有<br>影響                 | 有影響                      | 有很大<br>影響                |
|---------------|--------------------------|--------------------------|--------------------------|--------------------------|
| a. 注射疫苗後的副作用  | <input type="checkbox"/> | <input type="checkbox"/> | <input type="checkbox"/> | <input type="checkbox"/> |
| b. 不相信疫苗的成效   | <input type="checkbox"/> | <input type="checkbox"/> | <input type="checkbox"/> | <input type="checkbox"/> |
| c. 醫生沒有建議     | <input type="checkbox"/> | <input type="checkbox"/> | <input type="checkbox"/> | <input type="checkbox"/> |
| d. 政府沒有建議     | <input type="checkbox"/> | <input type="checkbox"/> | <input type="checkbox"/> | <input type="checkbox"/> |
| e. 父母／家人／親戚反對 | <input type="checkbox"/> | <input type="checkbox"/> | <input type="checkbox"/> | <input type="checkbox"/> |
| f. 同學／朋友不參加   | <input type="checkbox"/> | <input type="checkbox"/> | <input type="checkbox"/> | <input type="checkbox"/> |
| g. 擔心會影響發育    | <input type="checkbox"/> | <input type="checkbox"/> | <input type="checkbox"/> | <input type="checkbox"/> |
| h. 怕痛         | <input type="checkbox"/> | <input type="checkbox"/> | <input type="checkbox"/> | <input type="checkbox"/> |

3. 接上題，誰人決定你是否參與是次計劃？

- 爸爸 / 媽媽
- 自己
- 哥哥 / 姊姊
- 其他，請註明關係：\_\_\_\_\_

<轉後頁>

4. 你從甚麼途徑認識子宮頸癌預防疫苗？（可選多項）  
傳媒資訊（包括電視、電台、報章、雜誌、互聯網等）
- 醫生／診所                       父母／家人                       沒有聽過這種疫苗
- 親戚／朋友                       學校

5. 請從以下選出 一項 對子宮頸癌預防疫苗的正确描述：
- 女性未有初次月經前，不適合注射子宮頸癌預防疫苗
- 接種子宮頸癌預防疫苗後，能預防感染所有性病
- 注射子宮頸癌預防疫苗，與月經無關，亦不會影響發育

6. 以下哪些因素，會增加患上子宮頸癌的機會？（可選多項）
- 吸煙                                       有多位性伴侶                       睡眠不足
- 曾懷孕                                       早發生性行為

以下各題對子宮頸癌的描述是否正確？

|                               | 是                        | 不是                       | 不知道                      |
|-------------------------------|--------------------------|--------------------------|--------------------------|
| 7. 子宮頸癌是致命性的疾病                | <input type="checkbox"/> | <input type="checkbox"/> | <input type="checkbox"/> |
| 8. 子宮頸癌是其中一種香港女性普遍出現的癌症       | <input type="checkbox"/> | <input type="checkbox"/> | <input type="checkbox"/> |
| 9. 接種子宮頸癌預防疫苗，是有效的預防方法        | <input type="checkbox"/> | <input type="checkbox"/> | <input type="checkbox"/> |
| 10. 在接種子宮頸癌預防疫苗後，都需要定期接受子宮頸檢查 | <input type="checkbox"/> | <input type="checkbox"/> | <input type="checkbox"/> |
| 11. 子宮頸癌及早發現是容易醫治的            | <input type="checkbox"/> | <input type="checkbox"/> | <input type="checkbox"/> |

12. 你有否看了學校通告提及有關子宮頸癌的錄影片段？
- 有                       沒有                       沒留意                       已經忘記了內容

13. 如有，會否影響你參與是次「預防子宮頸癌疫苗接種計劃」？
- 絕對沒有影響      沒有影響      有影響      很大影響
- 

14. 你認為以下各種疾病的嚴重性如何？請圈出：以 4 代表最嚴重，1 代表最不嚴重。

|         | 最不嚴重 |   |   | 最嚴重 | 不知道                      |
|---------|------|---|---|-----|--------------------------|
| a. 水痘   | 1    | 2 | 3 | 4   | <input type="checkbox"/> |
| b. 子宮頸癌 | 1    | 2 | 3 | 4   | <input type="checkbox"/> |
| c. 肝炎   | 1    | 2 | 3 | 4   | <input type="checkbox"/> |
| d. 流感   | 1    | 2 | 3 | 4   | <input type="checkbox"/> |

13. 你曾否接種以下預防疫苗：
- |           | 有                        | 沒有                       | 不知道                      |
|-----------|--------------------------|--------------------------|--------------------------|
| a. 水痘疫苗   | <input type="checkbox"/> | <input type="checkbox"/> | <input type="checkbox"/> |
| b. 子宮頸癌疫苗 | <input type="checkbox"/> | <input type="checkbox"/> | <input type="checkbox"/> |
| c. 肺炎球菌疫苗 | <input type="checkbox"/> | <input type="checkbox"/> | <input type="checkbox"/> |
| d. 流感疫苗   | <input type="checkbox"/> | <input type="checkbox"/> | <input type="checkbox"/> |

問卷完，謝謝！

**The Chinese University of Hong Kong**  
**Centre for Health Education and Health Promotion and Department of Microbiology**  
**Prevention of Cervical Cancer Vaccination Programme**  
**Questionnaire – Student**

Please read the following questions and put a ✓ in the box next to your choice or write in the space provided.

1. Your Date of Birth : \_\_\_\_\_(Year) \_\_\_\_\_ (Month) \_\_\_\_\_ (Date)

2. Are you going to join the “Prevention of Cervical Cancer Vaccination Programme”?

- Yes → Please answer Q2A and Q3
- No → Please answer Q2B and Q3
- I have already received HPV vaccination → Please go to Q4

| 2A. How has the following factors affect your decision to join the programme? | Not at all Influential   | Not influential          | Influential              | Extremely Influential    |
|-------------------------------------------------------------------------------|--------------------------|--------------------------|--------------------------|--------------------------|
| a. This programme is organized by school                                      | <input type="checkbox"/> | <input type="checkbox"/> | <input type="checkbox"/> | <input type="checkbox"/> |
| b. This programme is recommended by university                                | <input type="checkbox"/> | <input type="checkbox"/> | <input type="checkbox"/> | <input type="checkbox"/> |
| c. Vaccine can effectively prevent cervical cancer                            | <input type="checkbox"/> | <input type="checkbox"/> | <input type="checkbox"/> | <input type="checkbox"/> |
| d. Vaccine is safe                                                            | <input type="checkbox"/> | <input type="checkbox"/> | <input type="checkbox"/> | <input type="checkbox"/> |
| e. Free vaccination                                                           | <input type="checkbox"/> | <input type="checkbox"/> | <input type="checkbox"/> | <input type="checkbox"/> |
| f. Doctor’s recommendation                                                    | <input type="checkbox"/> | <input type="checkbox"/> | <input type="checkbox"/> | <input type="checkbox"/> |
| g. Parents’/family members’ recommendation                                    | <input type="checkbox"/> | <input type="checkbox"/> | <input type="checkbox"/> | <input type="checkbox"/> |
| h. Classmates/friends join the programme                                      | <input type="checkbox"/> | <input type="checkbox"/> | <input type="checkbox"/> | <input type="checkbox"/> |

| 2A. How do the following factors affect your decision NOT to join the programme? | Not at all Influential   | Not influential          | Influential              | Extremely Influential    |
|----------------------------------------------------------------------------------|--------------------------|--------------------------|--------------------------|--------------------------|
| a. Possible side effect                                                          | <input type="checkbox"/> | <input type="checkbox"/> | <input type="checkbox"/> | <input type="checkbox"/> |
| b. Doubt the effectiveness of vaccine                                            | <input type="checkbox"/> | <input type="checkbox"/> | <input type="checkbox"/> | <input type="checkbox"/> |
| c. No doctor’s recommendation                                                    | <input type="checkbox"/> | <input type="checkbox"/> | <input type="checkbox"/> | <input type="checkbox"/> |
| d. No government’s recommendation                                                | <input type="checkbox"/> | <input type="checkbox"/> | <input type="checkbox"/> | <input type="checkbox"/> |
| e. Objection from Parents / family members                                       | <input type="checkbox"/> | <input type="checkbox"/> | <input type="checkbox"/> | <input type="checkbox"/> |
| f. Classmates/friends have not joined                                            | <input type="checkbox"/> | <input type="checkbox"/> | <input type="checkbox"/> | <input type="checkbox"/> |
| g. Worry that vaccine may affect growth                                          | <input type="checkbox"/> | <input type="checkbox"/> | <input type="checkbox"/> | <input type="checkbox"/> |
| h. Fear of the pain of injection                                                 | <input type="checkbox"/> | <input type="checkbox"/> | <input type="checkbox"/> | <input type="checkbox"/> |

3. Who made the decision to let you join the programme?

- Father / Mother
- Myself
- Elder brother / Elder sister
- Others, please specify: \_\_\_\_\_

4. How did you learn about HPV vaccination? (You may choose more than one answer)
- Mass media (including television, radio, newspapers, magazines and internet, etc.)
- Doctor / Clinic                       Parents / family members                       Never heard of HPV vaccination
- Relatives / Friends                       School

5. Which one of the following do you think is correct about HPV vaccination?
- Girls should not receive HPV vaccination before their first menstruation
- HPV vaccination can provide protection to all sexually transmitted disease
- HPV vaccination is not related to menstruation and would not affect growth

6. Which of the following(s) increase the likelihood of getting cervical cancer? (may choose >1 answer)
- Smoking                       Multiple sex partners                       Not enough sleep
- Pregnant before                       Early sex

| Are the following statements about cervical cancer correct?                    | Yes                      | No                       | Don't Know               |
|--------------------------------------------------------------------------------|--------------------------|--------------------------|--------------------------|
| 7. Cervical cancer is a fetal disease.                                         | <input type="checkbox"/> | <input type="checkbox"/> | <input type="checkbox"/> |
| 8. Cervical cancer is one of the common cancers found women in Hong Kong.      | <input type="checkbox"/> | <input type="checkbox"/> | <input type="checkbox"/> |
| 9. HPV vaccination is an effective way to prevent cervical cancer.             | <input type="checkbox"/> | <input type="checkbox"/> | <input type="checkbox"/> |
| 10. Females still need to receive Pap's smears regularly after HPV vaccination | <input type="checkbox"/> | <input type="checkbox"/> | <input type="checkbox"/> |
| 11. Early stage of cervical cancer is easy to treat.                           | <input type="checkbox"/> | <input type="checkbox"/> | <input type="checkbox"/> |

12. Did you watch the video on cervical cancer mentioned in the school notice?
- Yes                       No                       No aware of it                       Forgot the contents

13. If yes, how does it affect your decision to join the programme?
- |  | Not at all Influential   | Not influential          | Influential              | Extremely influential    |
|--|--------------------------|--------------------------|--------------------------|--------------------------|
|  | <input type="checkbox"/> | <input type="checkbox"/> | <input type="checkbox"/> | <input type="checkbox"/> |

14. What do you think about the severity of the following diseases? Please circle your answer: 1 = Not at all severe , 4= Extremely severe.

|                    | Not at all |   |   | Extremely Severe | Don't Know               |
|--------------------|------------|---|---|------------------|--------------------------|
| a. Chicken pox     | 1          | 2 | 3 | 4                | <input type="checkbox"/> |
| b. Cervical Cancer | 1          | 2 | 3 | 4                | <input type="checkbox"/> |
| c. Hepatitis       | 1          | 2 | 3 | 4                | <input type="checkbox"/> |
| d. Influenza       | 1          | 2 | 3 | 4                | <input type="checkbox"/> |

13. Have you ever received any of the following vaccination?
- |                         | Yes                      | No                       | Don't Know               |
|-------------------------|--------------------------|--------------------------|--------------------------|
| a. Varicella vaccine    | <input type="checkbox"/> | <input type="checkbox"/> | <input type="checkbox"/> |
| b. HPV vaccine          | <input type="checkbox"/> | <input type="checkbox"/> | <input type="checkbox"/> |
| c. Pneumococcal vaccine | <input type="checkbox"/> | <input type="checkbox"/> | <input type="checkbox"/> |
| d. Influenza vaccine    | <input type="checkbox"/> | <input type="checkbox"/> | <input type="checkbox"/> |
